# Supplementary material for: Silica aerogel modified electrospun polyacrylonitrile as a sorbent for thin-film microextraction of chlorpyrifos from real samples coupled with corona discharge ion mobility spectrometry detection
Source: Royal Society of Chemistry journal article supplement (doi:10.1039/d2ay01310j), 2022-01-01
Supplement: d2ay01310j1.pdf [file d2ay01310j1.pdf]

## Electronic Supplementary Information

**Silica aerogel modified electrospun polyacrylonitrile as a sorbent for thin-film  
microextraction of chlorpyrifos from real samples coupled with corona discharge ion  
mobility spectrometry detection**

Maliheh Heidarbeigi, Mohammad Saraji\* and Mohammad Taghi Jafari

\*Corresponding author: Professor Mohammad Saraji, Department of Chemistry, Isfahan

University of Technology, Isfahan 84156-83111, Iran

**E-mail address:** saraji@iut.ac.ir, msaraji@ymail.com

**Fax:** +98 31 33912350

[ORCID: 0000-0002-1570-0718](https://orcid.org/0000-0002-1570-0718)

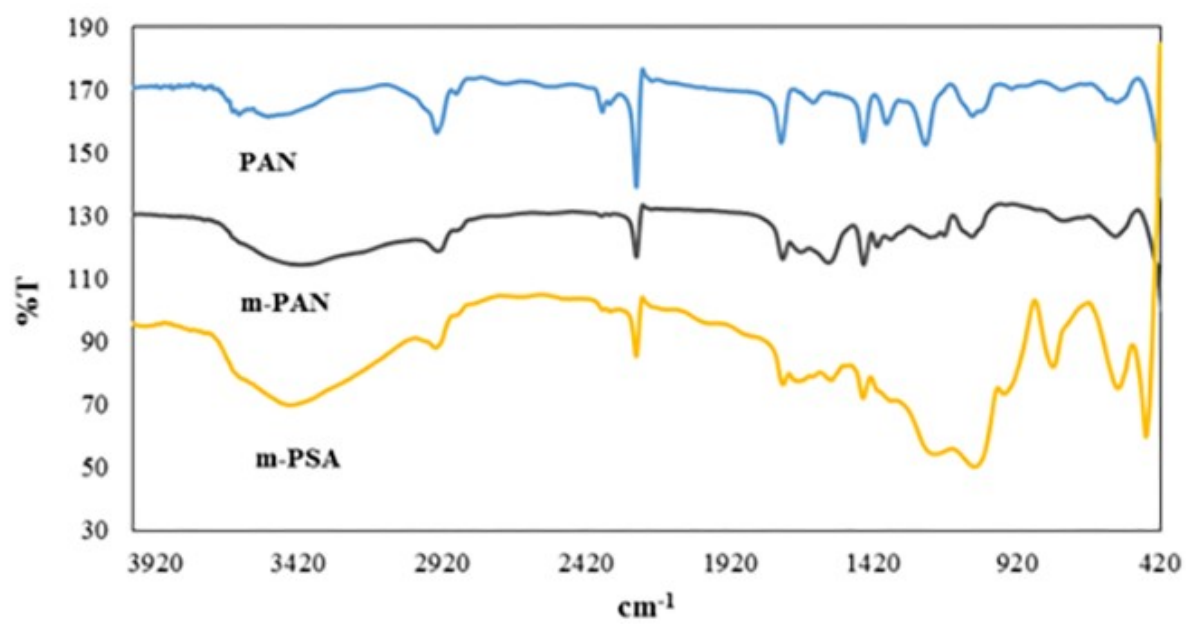

Fig. S1 The FT-IR spectra of PAN, m-PAN, and m-PSA.

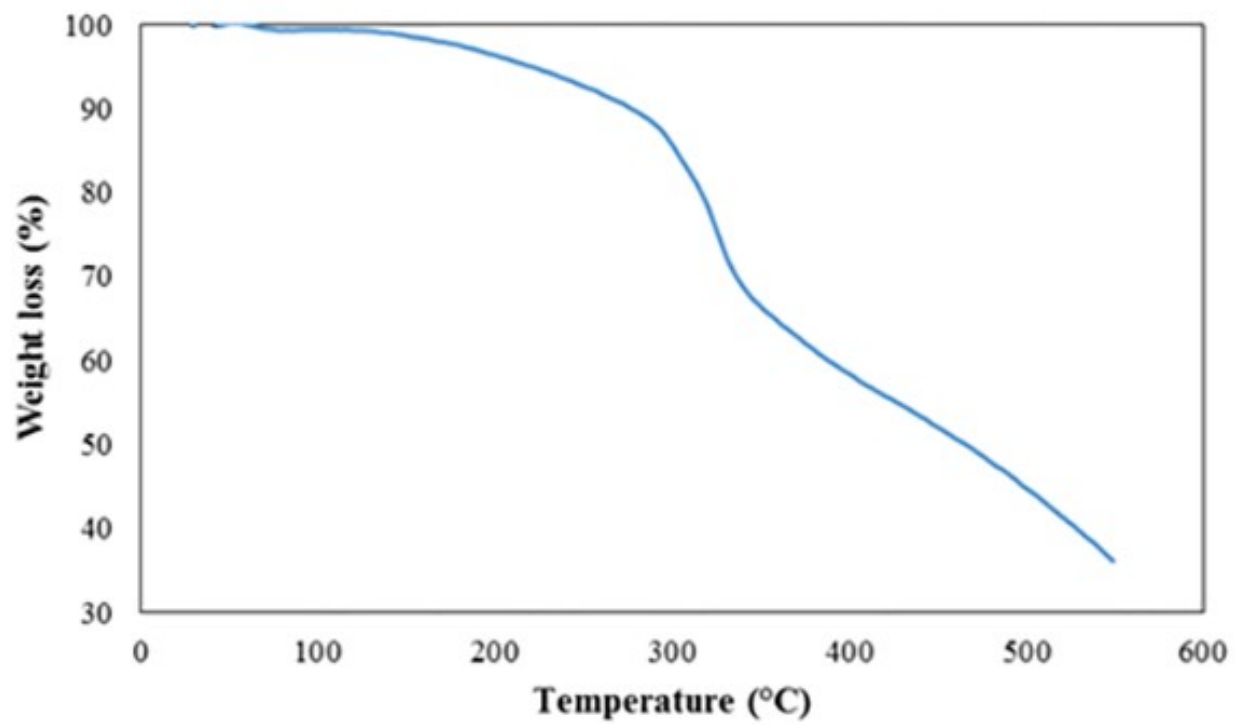

Fig. S2 The TGA curve of m-PSA.

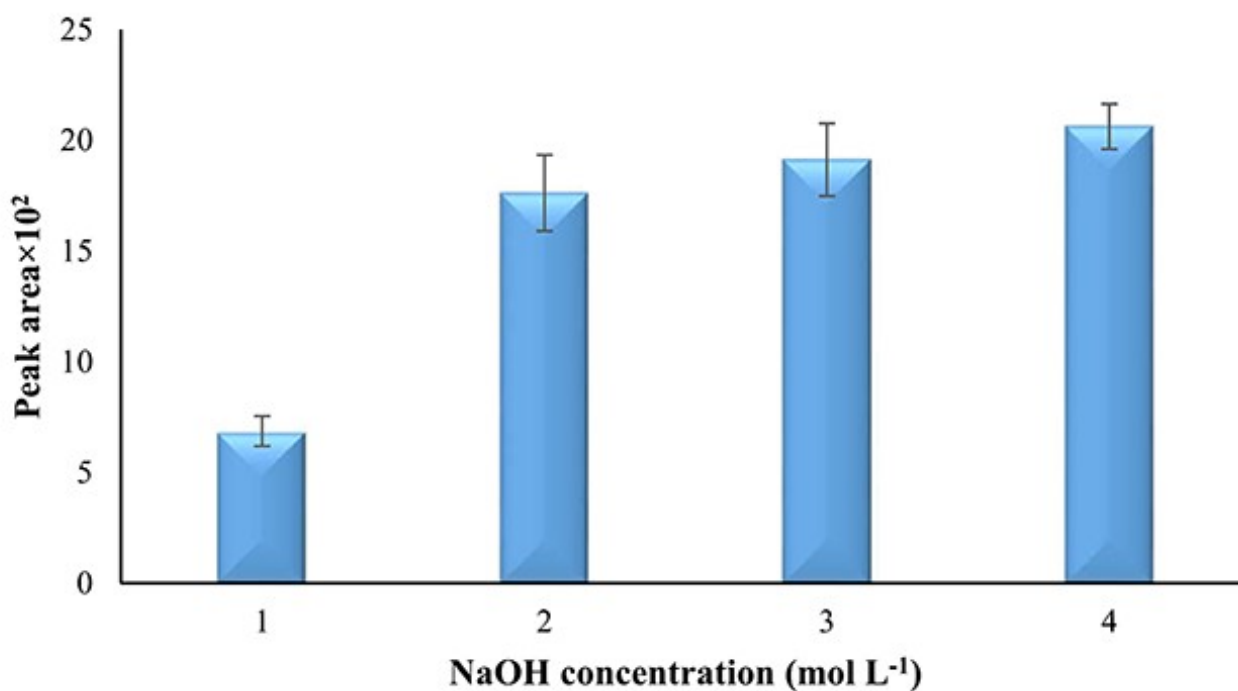

Fig. S3 The effect of NaOH concentration on the extraction efficiency (analyte concentration; 20  $\mu\text{g L}^{-1}$ , hydrolysis temperature; 60  $^{\circ}\text{C}$ , hydrolysis time; 2 h, ammonia concentration; 1.5% (v/v), immersion time in ammonia solution; 10 min, gelation time; 30 s, stirring rate; 800 rpm, extraction temperature; 25  $^{\circ}\text{C}$ , and extraction time; 10 min).

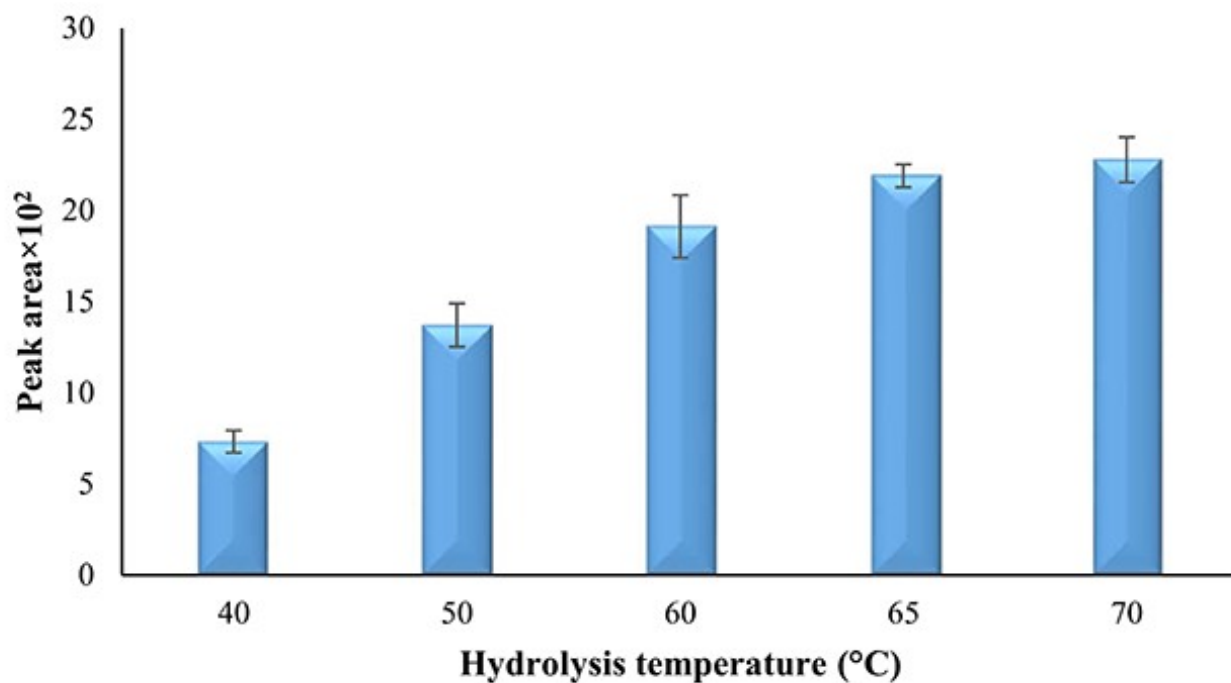

Fig. S4 The effect of hydrolysis temperature on the extraction efficiency (analyte concentration;  $20 \mu\text{g L}^{-1}$ , NaOH concentration;  $3 \text{ mol L}^{-1}$ , hydrolysis time; 2h, ammonia concentration; 1.5% (v/v), immersion time in ammonia solution; 10 min, gelation time; 30 s, stirring rate; 800 rpm, extraction temperature;  $25 \text{ }^\circ\text{C}$ , and extraction time; 10 min).

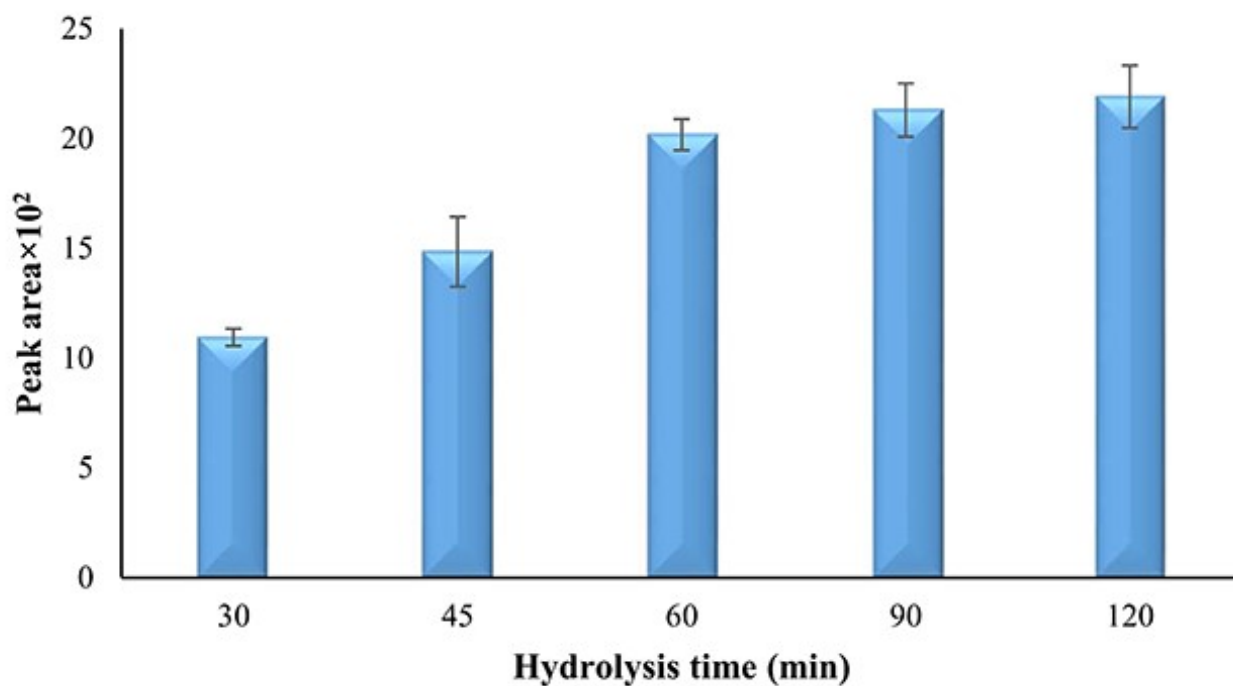

Fig. S5 The effect of hydrolysis time on the extraction efficiency (analyte concentration;  $20 \mu\text{g L}^{-1}$ , NaOH concentration;  $3 \text{ mol L}^{-1}$ , hydrolysis temperature;  $65 \text{ }^\circ\text{C}$ , ammonia concentration;  $1.5\% \text{ (v/v)}$ , immersion time in ammonia solution; 10 min, gelation time; 30 s, stirring rate; 800 rpm, extraction temperature;  $25 \text{ }^\circ\text{C}$ , and extraction time; 10 min).

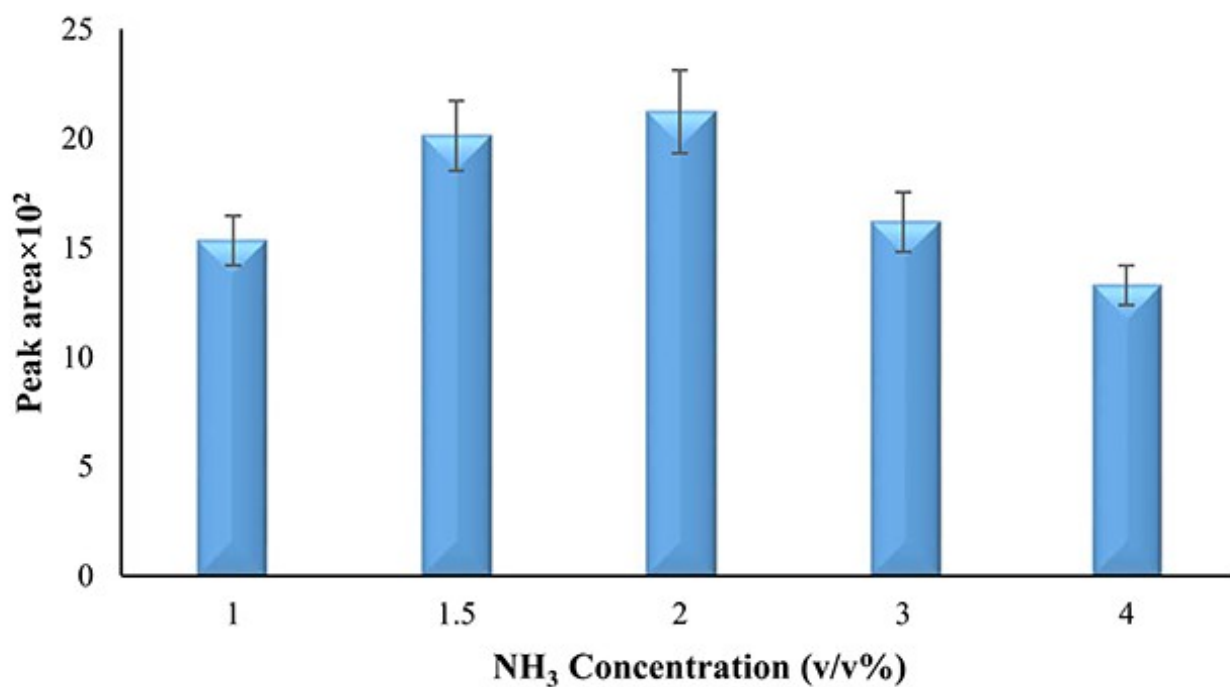

Fig. S6 The effect of ammonia concentration on the extraction efficiency (analyte concentration; 20  $\mu\text{g L}^{-1}$ , NaOH concentration; 3 mol  $\text{L}^{-1}$ , hydrolysis temperature; 65  $^{\circ}\text{C}$ , hydrolysis time; 1 h, immersion time in ammonia solution; 10 min, gelation time; 30 s, stirring rate; 800 rpm, extraction temperature; 25  $^{\circ}\text{C}$ , and extraction time; 10 min).

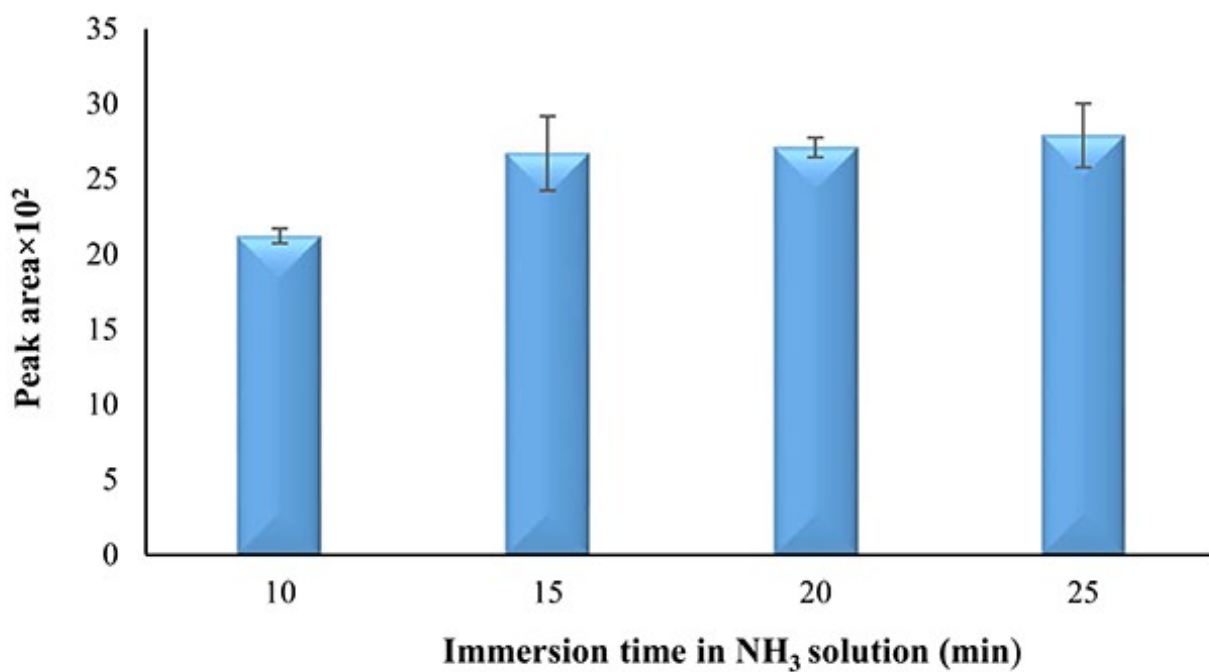

Fig. S7 The effect of immersion time in ammonia solution on the extraction efficiency (analyte concentration; 20  $\mu\text{g L}^{-1}$ , NaOH concentration; 3 mol  $\text{L}^{-1}$ , hydrolysis temperature; 65  $^{\circ}\text{C}$ , hydrolysis time; 1h, ammonia concentration; 2% (v/v), gelation time; 30 s, stirring rate; 800 rpm, extraction temperature; 25  $^{\circ}\text{C}$ , and extraction time; 10 min).



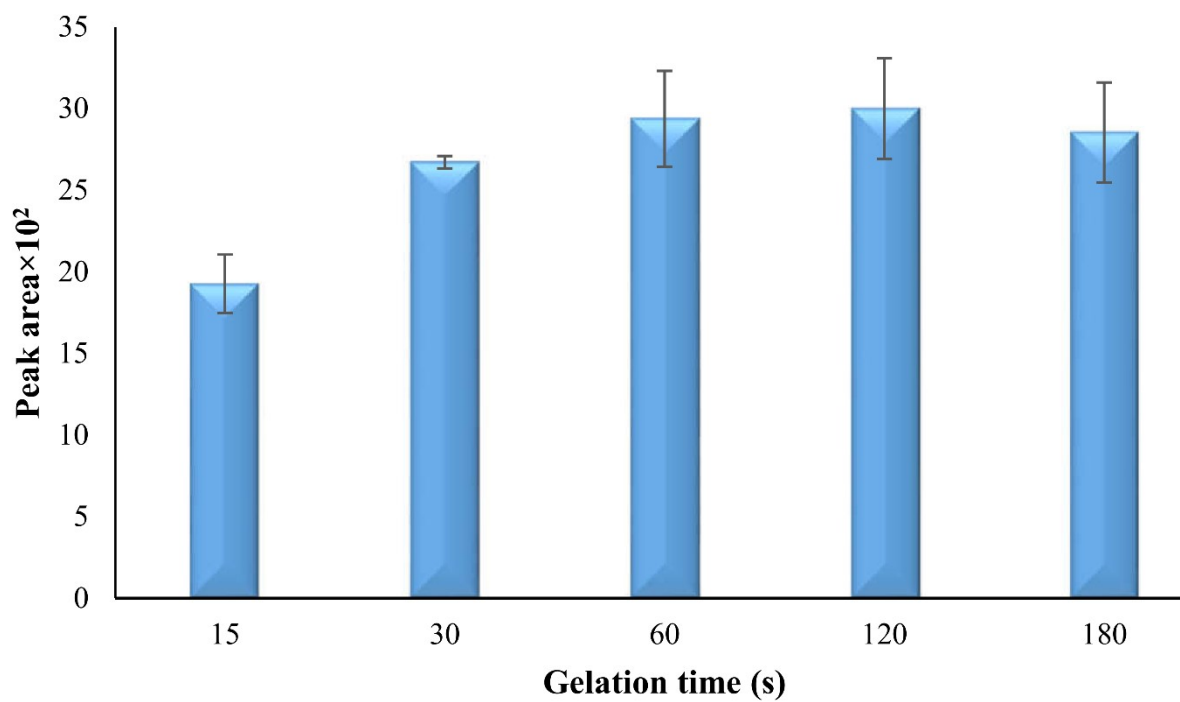

Fig. S8 The effect of gelation time on the extraction efficiency (analyte concentration;  $20 \mu\text{g L}^{-1}$ , NaOH concentration;  $3 \text{ mol L}^{-1}$ , hydrolysis temperature;  $65 \text{ }^\circ\text{C}$ , hydrolysis time; 1 h, ammonia concentration; 2% (v/v), immersion time in ammonia solution; 15 min, stirring rate; 800 rpm, extraction temperature;  $25 \text{ }^\circ\text{C}$ , and extraction time; 10 min).

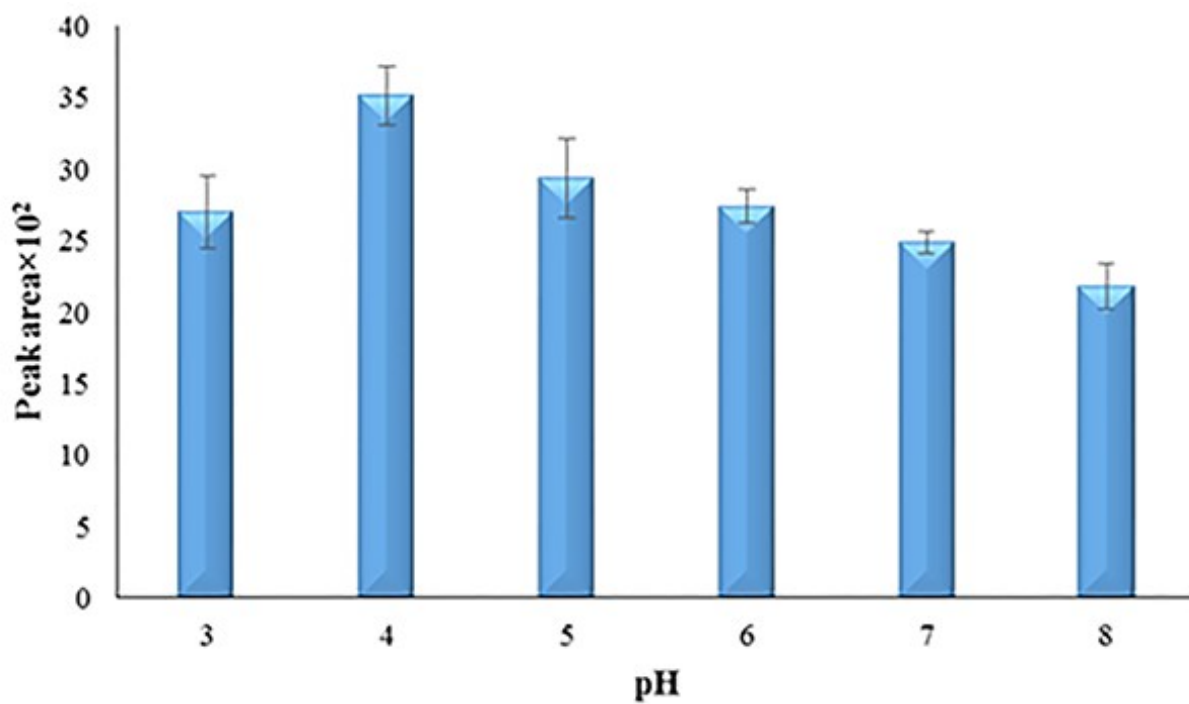

Fig. S9 The effect of solution pH on the extraction efficiency (analyte concentration; 20  $\mu\text{g L}^{-1}$ , NaOH concentration; 3  $\text{mol L}^{-1}$ , hydrolysis temperature; 65  $^{\circ}\text{C}$ , hydrolysis time; 1 h, ammonia concentration; 2% (v/v), immersion time in ammonia solution; 15 min, gelation time; 1 min, stirring rate; 800 rpm, extraction temperature; 25  $^{\circ}\text{C}$ , and extraction time; 10 min).

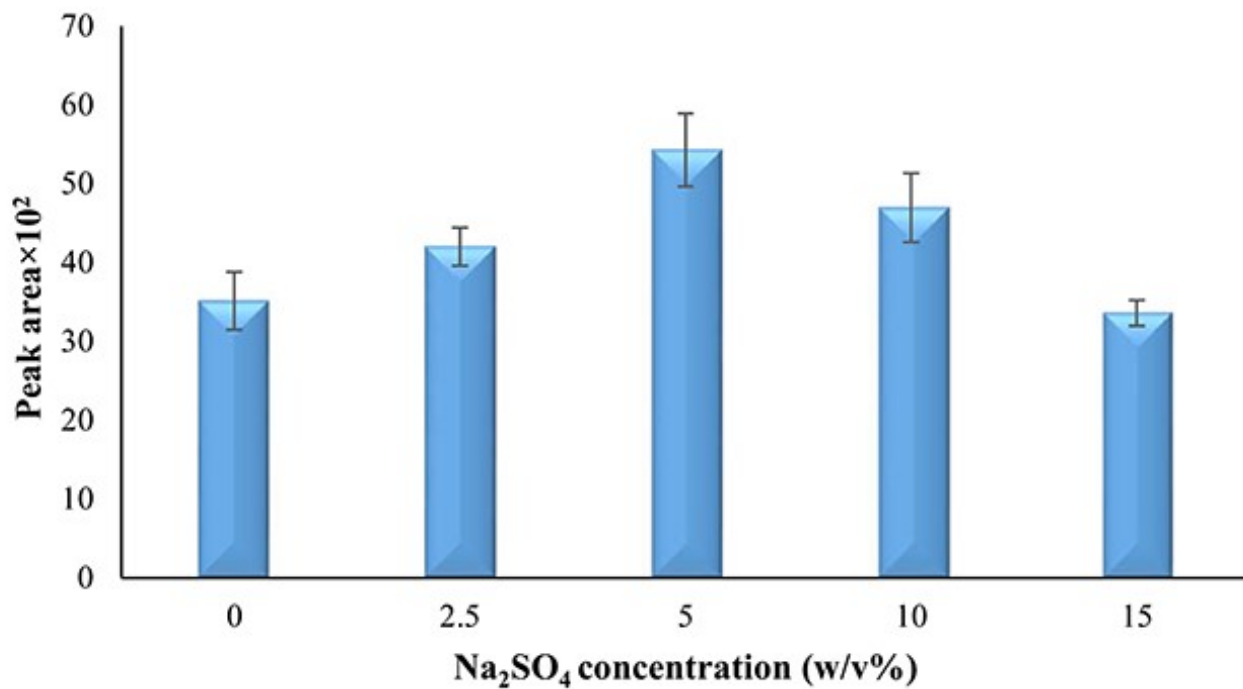

Fig. S10 The effect of ionic strength on extraction efficiency (analyte concentration;  $20 \mu\text{g L}^{-1}$ , NaOH concentration;  $3 \text{ mol L}^{-1}$ , hydrolysis temperature;  $65 \text{ }^\circ\text{C}$ , hydrolysis time; 1 h, ammonia concentration; 2% (v/v), immersion time in ammonia solution; 15 min, gelation time; 1 min, solution pH; 4, stirring rate; 800 rpm, extraction temperature;  $25 \text{ }^\circ\text{C}$ , and extraction time; 10 min).

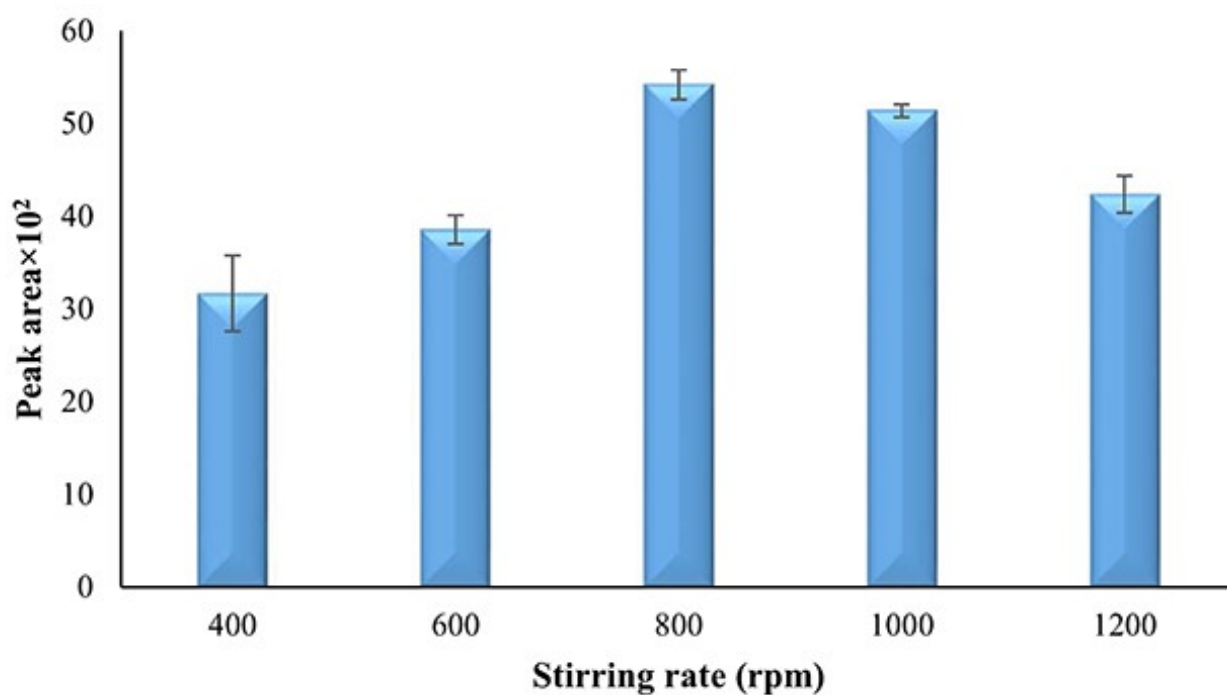

Fig. S11 The effect of stirring time on the extraction efficiency (analyte concentration;  $20 \mu\text{g L}^{-1}$ , NaOH concentration;  $3 \text{ mol L}^{-1}$ , hydrolysis temperature;  $65 \text{ }^\circ\text{C}$ , hydrolysis time; 1 h, ammonia concentration; 2% (v/v), immersion time in ammonia solution; 15 min, gelation time; 1 min, solution pH; 4,  $\text{Na}_2\text{SO}_4$  concentration; 5% (w/v), extraction temperature;  $25 \text{ }^\circ\text{C}$ , and extraction time; 10 min).

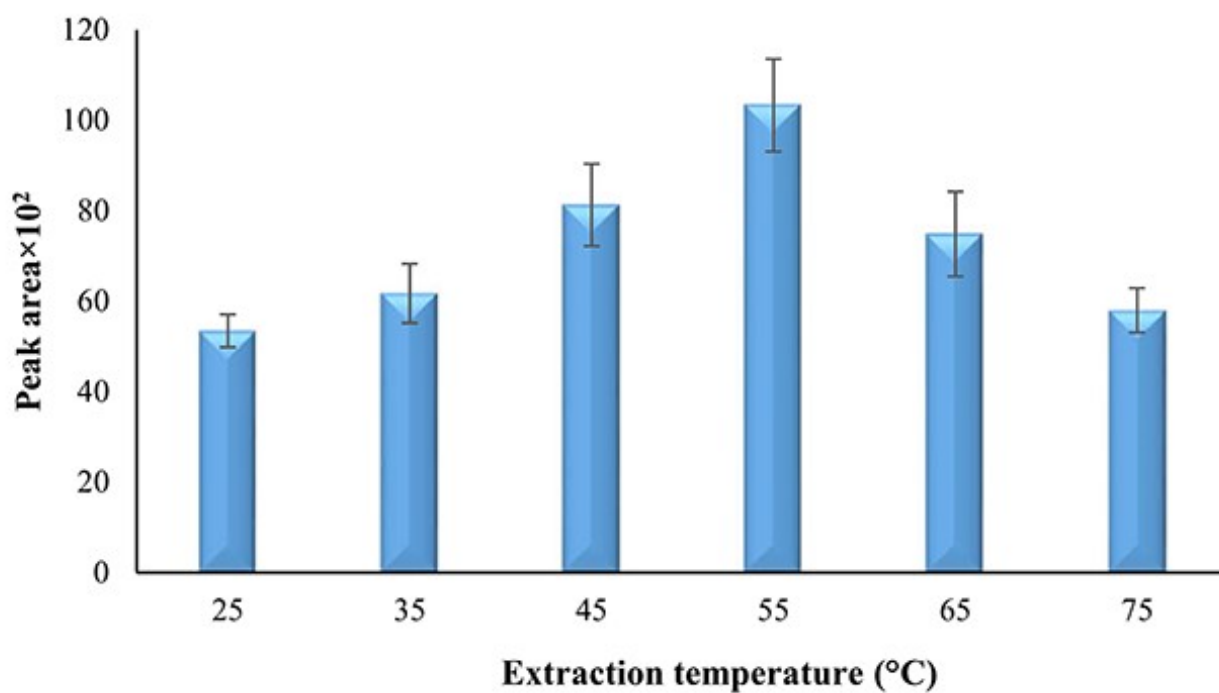

Fig. S12 The effect of extraction temperature on the extraction efficiency (analyte concentration;  $20 \mu\text{g L}^{-1}$ , NaOH concentration;  $3 \text{ mol L}^{-1}$ , hydrolysis temperature;  $65 \text{ }^\circ\text{C}$ , hydrolysis time; 1 h, ammonia concentration; 2% (v/v), immersion time in ammonia solution; 15 min, gelation time; 1 min, solution pH; 4,  $\text{Na}_2\text{SO}_4$  concentration; 5% (w/v), and extraction time; 10 min).

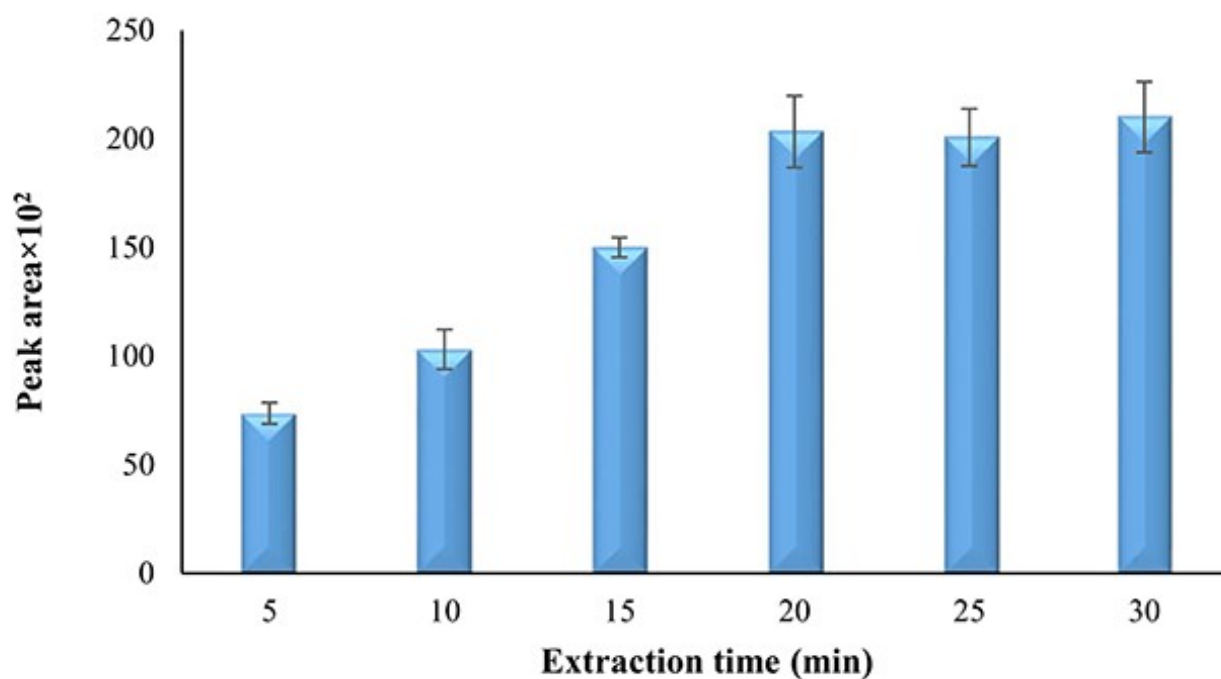

Fig. S13 The effect of extraction time on the extraction efficiency (analyte concentration;  $20 \mu\text{g L}^{-1}$ , NaOH concentration;  $3 \text{ mol L}^{-1}$ , hydrolysis temperature;  $65 \text{ }^\circ\text{C}$ , hydrolysis time; 1 h, ammonia concentration; 2% (v/v), immersion time in ammonia solution; 15 min, gelation time; 1 min, solution pH; 4,  $\text{Na}_2\text{SO}_4$  concentration; 5% (w/v), and extraction temperature;  $55 \text{ }^\circ\text{C}$  ).

**Table S1** Operation parameters of CD-IMS

| Parameter                          | Setting                   |
|------------------------------------|---------------------------|
| Needle voltage                     | 4.0 kV                    |
| Target electrode voltage           | 8.0 kV                    |
| Drift field                        | 450 V cm <sup>-1</sup>    |
| Drift gas flow (N <sub>2</sub> )   | 1000 mL min <sup>-1</sup> |
| Carrier gas flow (N <sub>2</sub> ) | 800 mL min <sup>-1</sup>  |
| Temperature of cell                | 160 °C                    |
| Temperature of injector            | 200 °C                    |
| Drift tube length                  | 11 cm                     |
| Shutter gride pulse                | 200 μs                    |
| Sampling frequency                 | 25000 Hz                  |
